# Supplementary material
Source: publisher site journal article supplement (https://www.dovepress.com/article/451402)
Supplement: Supplementary file 1 [file get_supplementary_file.php]

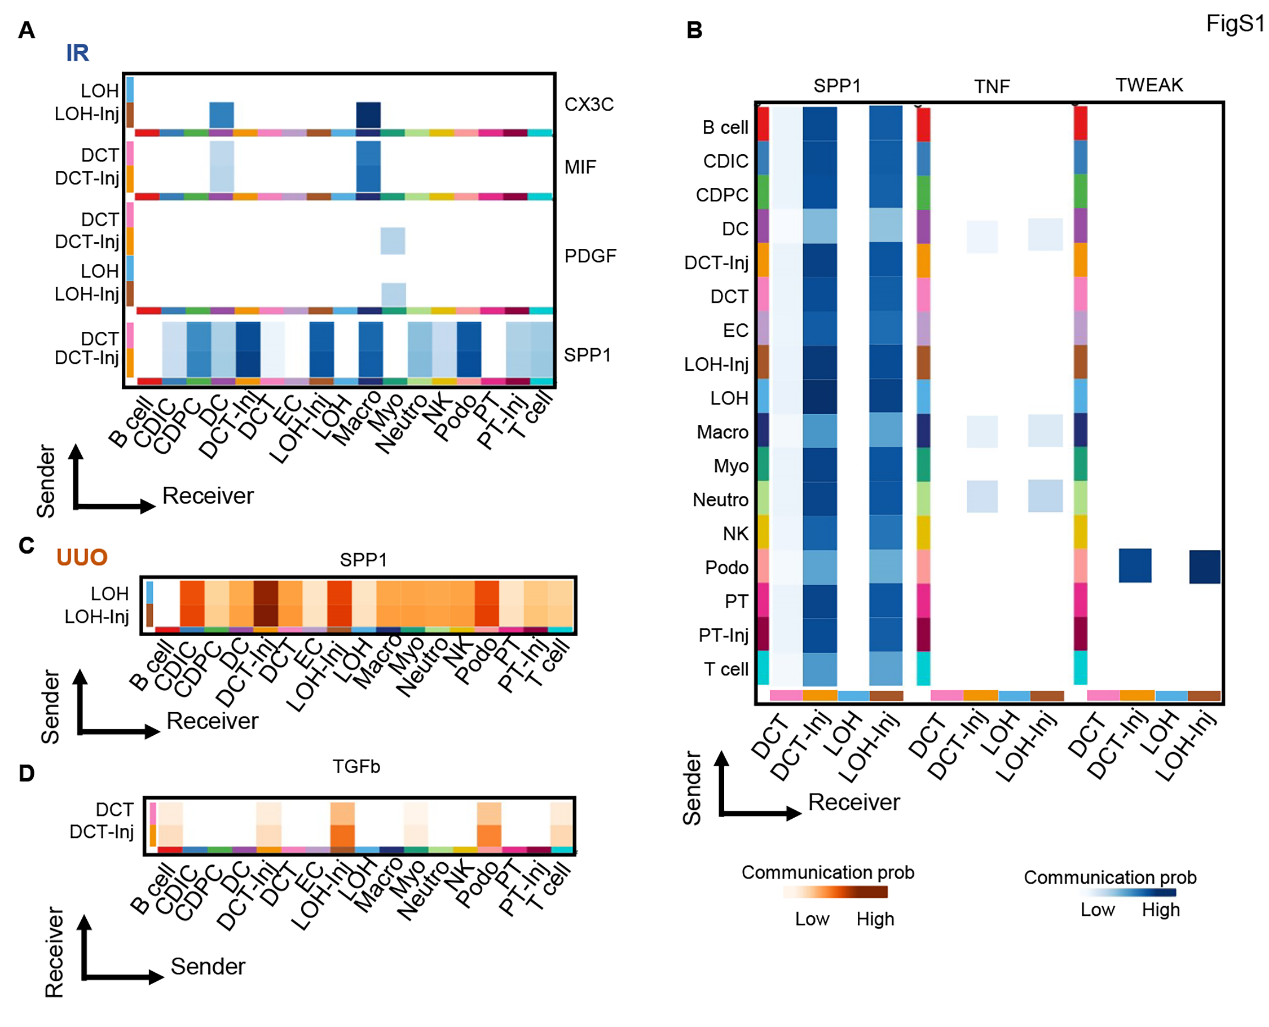


**Supplementary Figure 1.** **Injured distal nephron associated with an activated SPP1 pathway.**

(A) In IR, DCT-Inj and LOH-Inj send CX3C, MIF, PDGF, and SPP1 signals.

(B) In IR, DCT-Inj and LOH-Inj received SPP1, TNF, and TWEAK signals.

(C) In UUO, LOH-Inj send SPP1 signal in UUO.

(D) In UUO, DCT-Inj received TGFb signal in UUO.


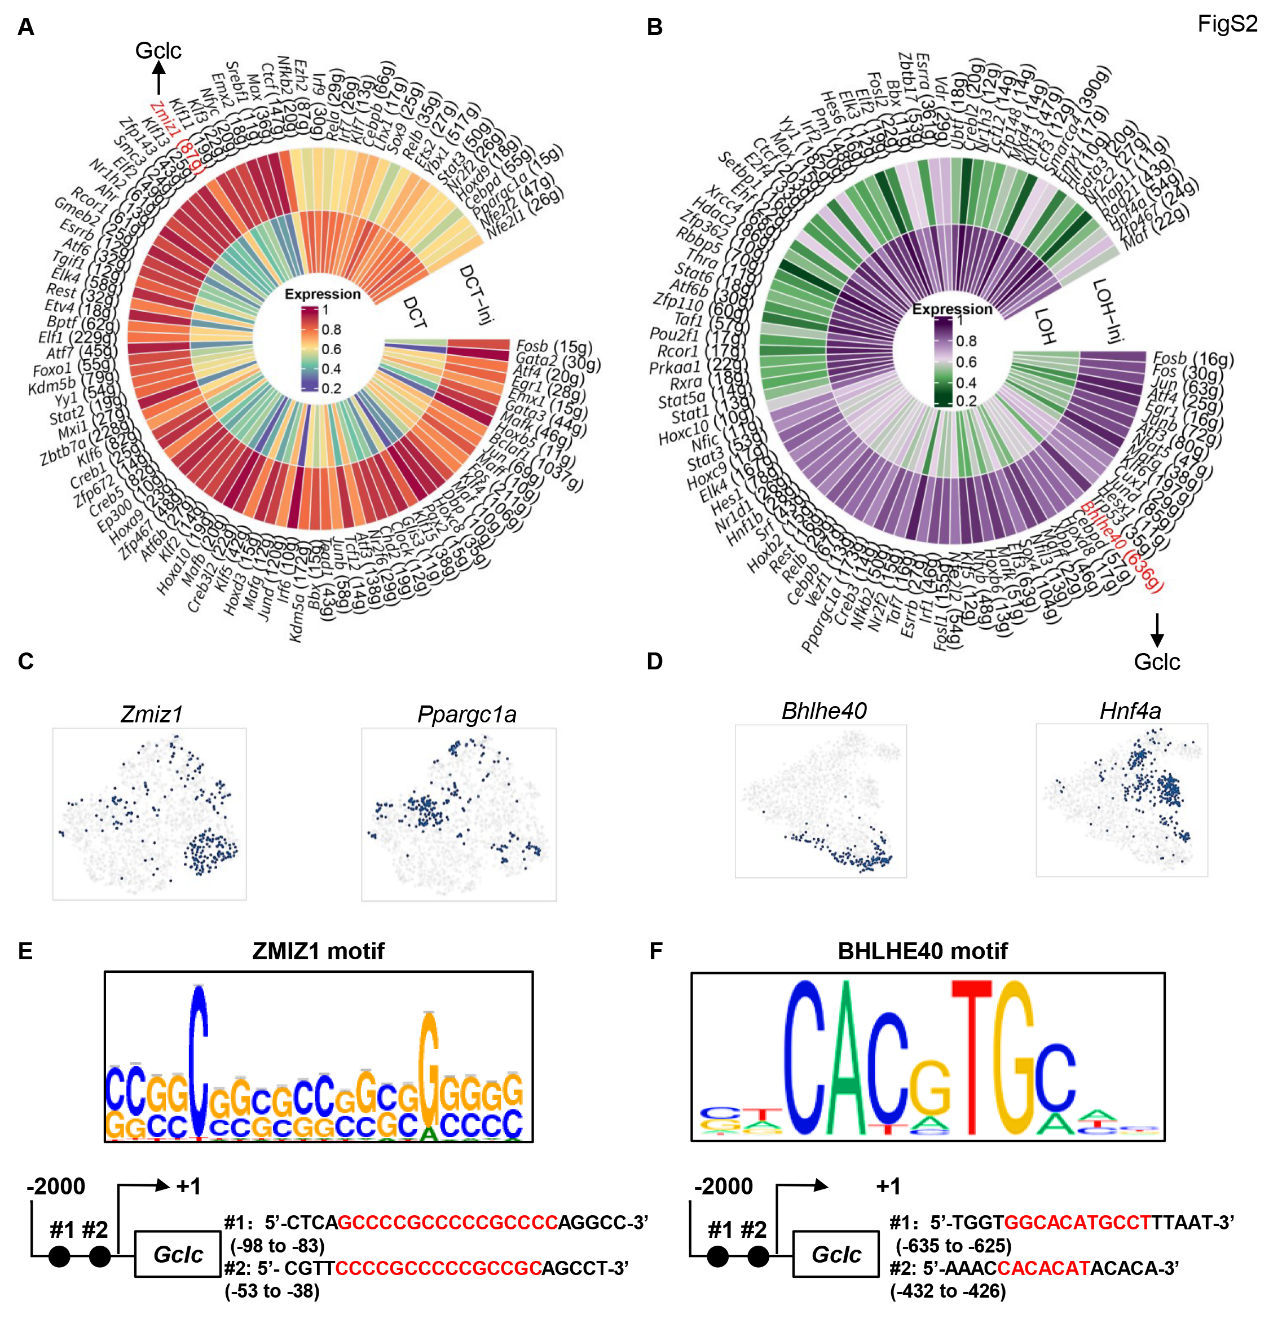


**Supplementary Figure 2.** **Transcription factors of DCT-Inj and LOH-Inj promoted the transcription of *Gclc*.**

(A) Representative transcription factor heatmaps of DCT-Inj and DCT.

(B) Representative transcription factor heatmaps of LOH-Inj and LOH.

(C) Dimplot of the transcriptional active sites of the representative transcription factors *Zmiz1* and *Ppargc1a* of DCT-Inj and DCT.

(D) Dimplot of the transcriptional active sites of the representative transcription factors *Bhlhe40* and *Hnf4a* of LOH-Inj and LOH.

(E) Prediction of the motif of the transcription factor ZMIZ1 and the binding site of ZMIZ1 and its target gene *Gclc*.

(F) Prediction of the motif of the transcription factor BHLHE40 and the binding site of BHLHE40 and its target gene *Gclc*.


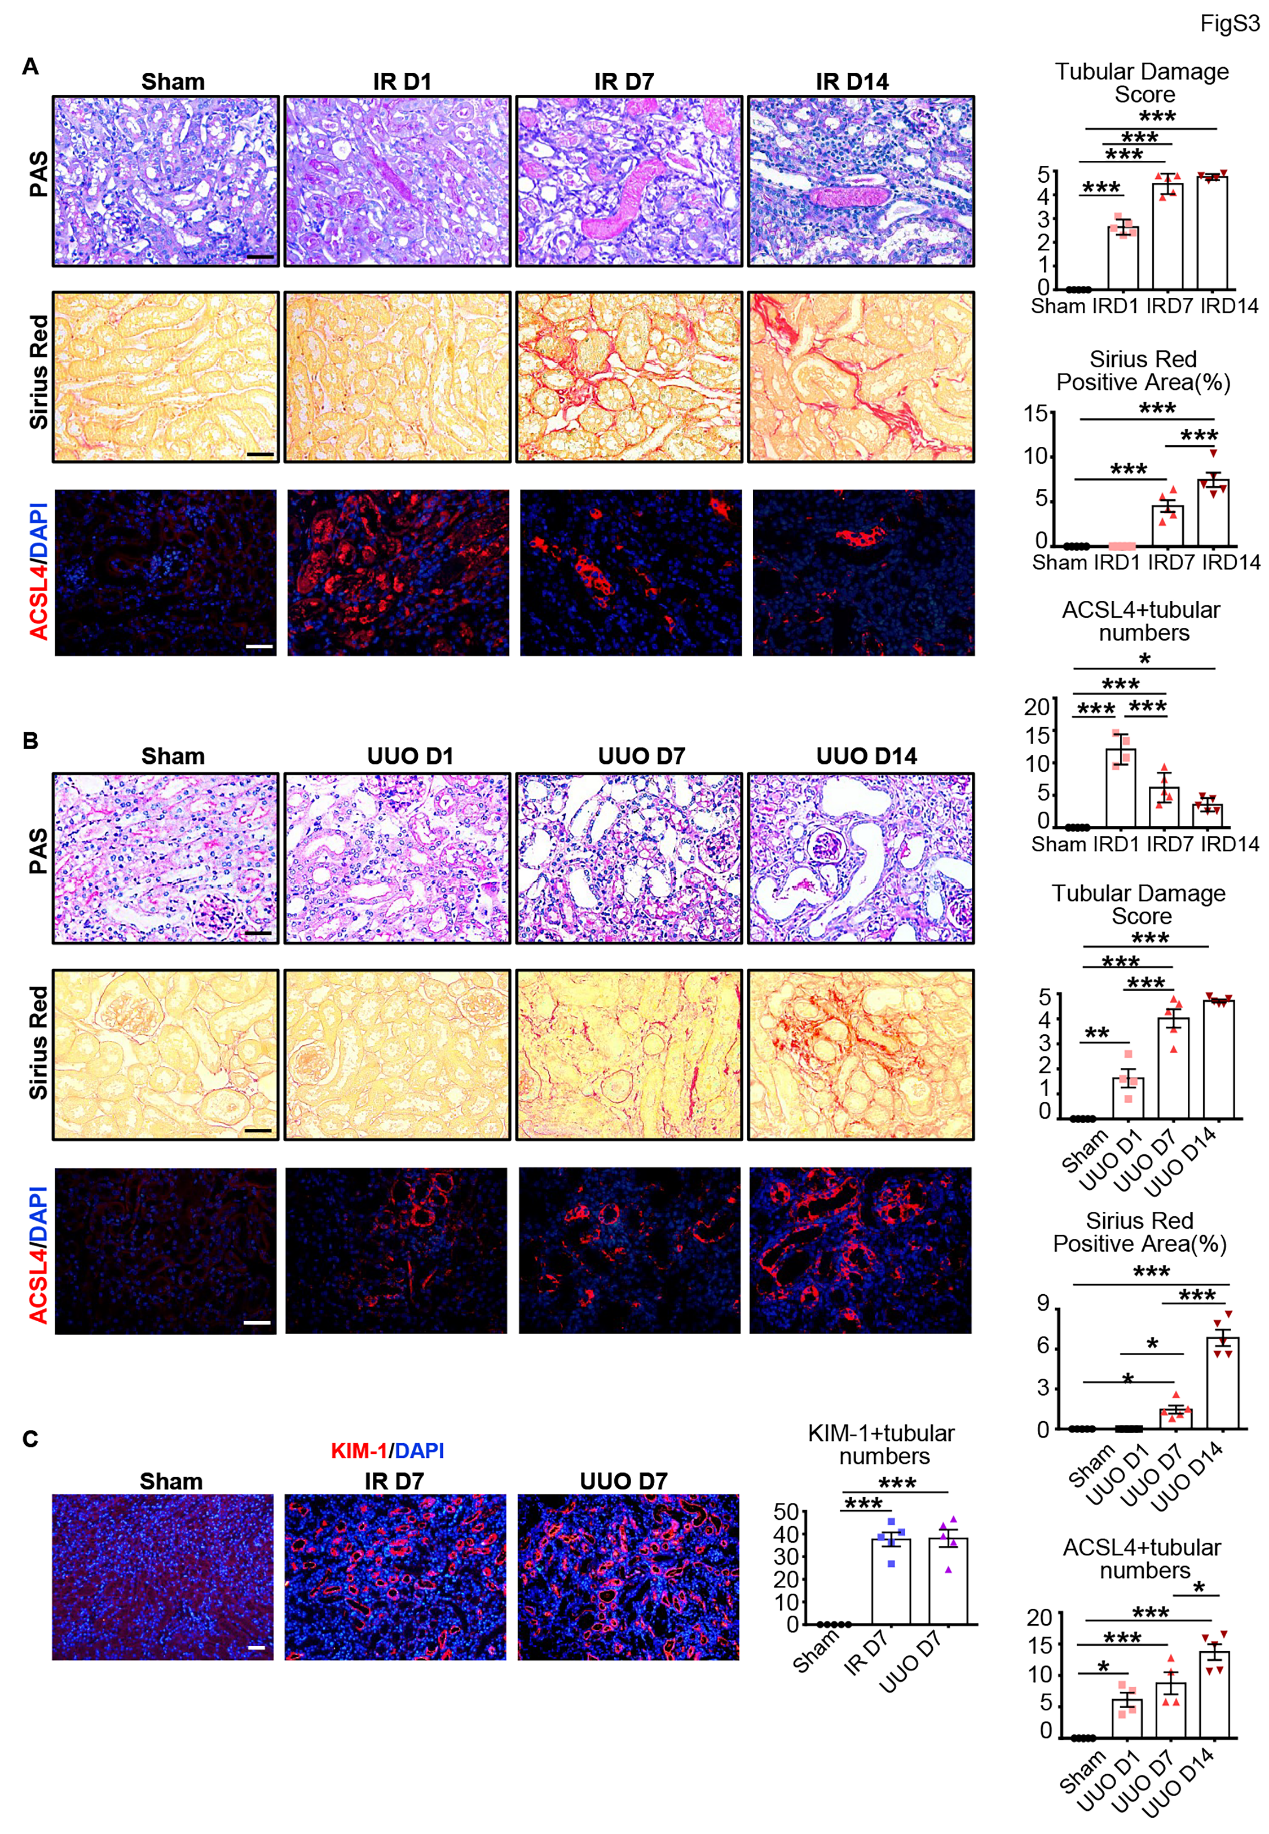


**Supplementary Figure 3.** **ACSL4 significantly increased during IR D1.**

(A) PAS, Sirius Red, and ACSL4 immunofluorescence staining and corresponding scores at different time points of IR (*n* = 4-5 per group).

(B) PAS, Sirius Red, and ACSL4 immunofluorescence staining and corresponding scores at different time points of UUO (*n* = 4-5 per group).

(C) Immunofluorescence staining and scoring of KIM-1 in IR D7 and UUO D7 (*n* = 4-5 per group).

**P <* 0.05, ***P <* 0.01, ****P <* 0.001 as determined by one-way ANOVA. Scale bar, 20 μm. Data represent mean ± SEM.
